# Supplementary material for: Enhanced photoelectrochemical water splitting of CrTiO2nanotube photoanodes by the decoration of their surfaceviathe photodeposition of Ag and Au
Source: Royal Society of Chemistry journal article supplement (doi:10.1039/c8dt02383b), 2018-01-01
Supplement: c8dt02383b1.pdf [file c8dt02383b1.pdf]

## Enhanced photoelectrochemical water splitting of CrTiO<sub>2</sub> nanotube photoanodes by decoration of their surface via photodeposition of Ag and Au

Tayebeh Sharifi<sup>a</sup>, Yousef Ghayeb<sup>a\*</sup>, Tecush Mohammadi<sup>a</sup>, and Mohamad Mohsen Momeni<sup>a</sup>

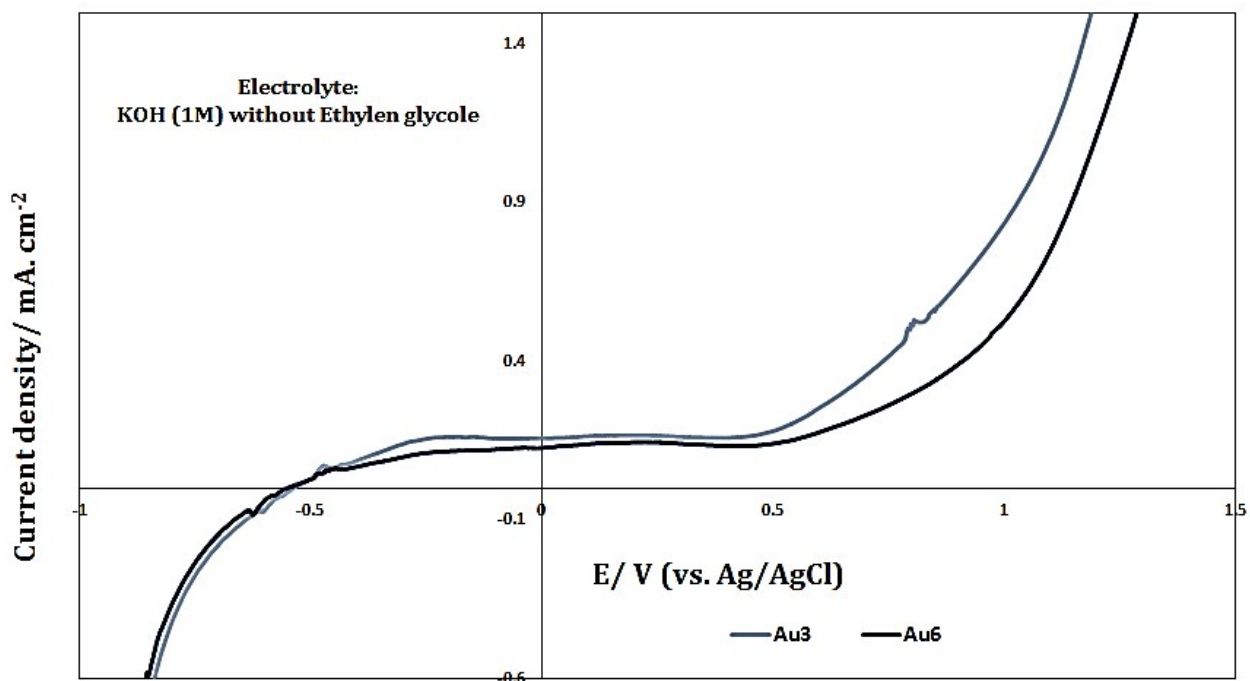

Fig. S1. LSV of Au<sub>2</sub>/CrTiO<sub>2</sub>NTs and Au<sub>6</sub>/CrTiO<sub>2</sub>NTs in KOH (1M) solution without ethylene glycol. The anodic peak was eliminated by removing ethylene glycol from the solution

<sup>a</sup> Department of Chemistry, Isfahan University of Technology, Isfahan, Iran

\* Corresponding Author: Ghayeb@cc.iut.ac.ir

Electronic Supplementary Information (ESI) available: [details of any supplementary information available should be included here]. See DOI: 10.1039/x0xx00000x

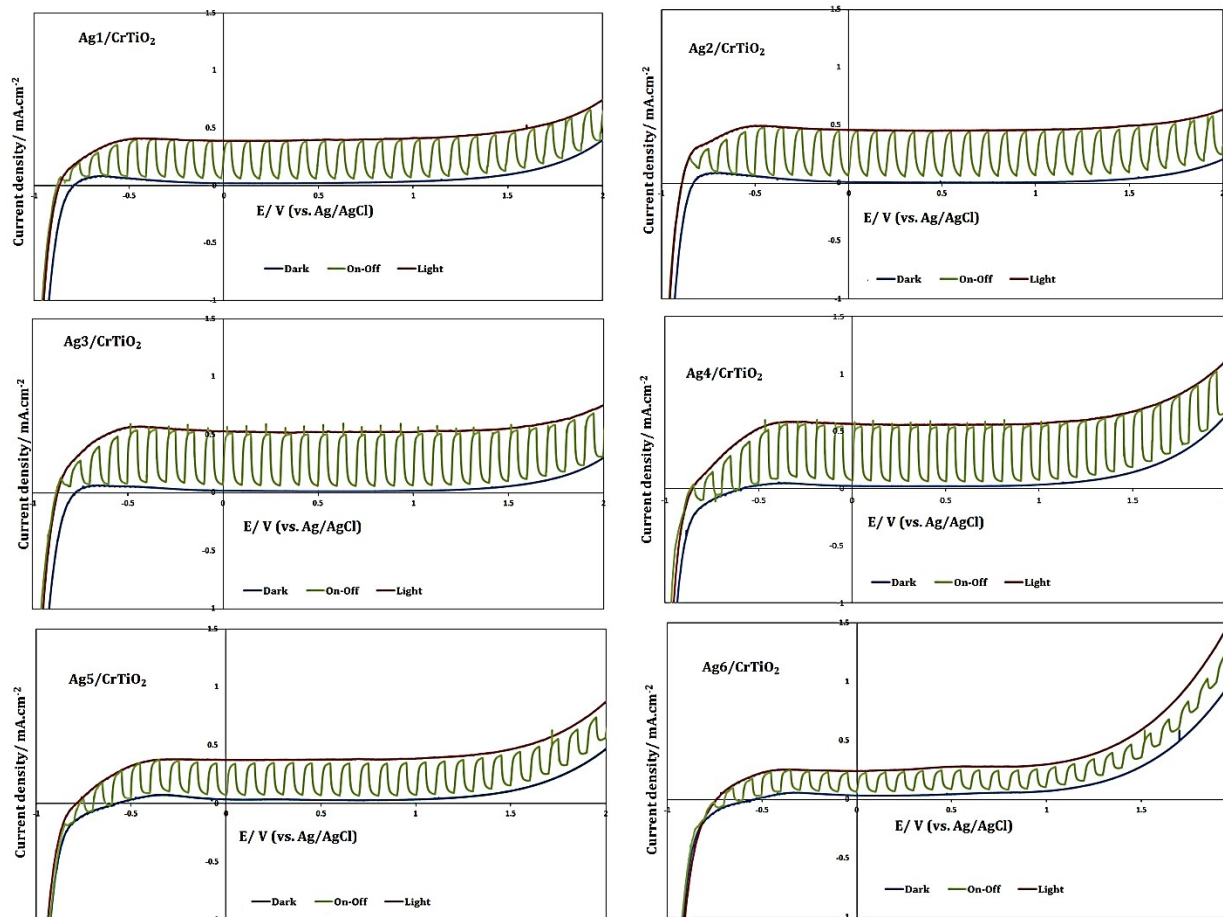

**Fig. S2.** LSV of Ag/CrTiO<sub>2</sub> NTs samples recorded in KOH (1 M) aqueous solution containing 5% V ethylene glycol in the dark, under constant illumination and chopped light irradiation

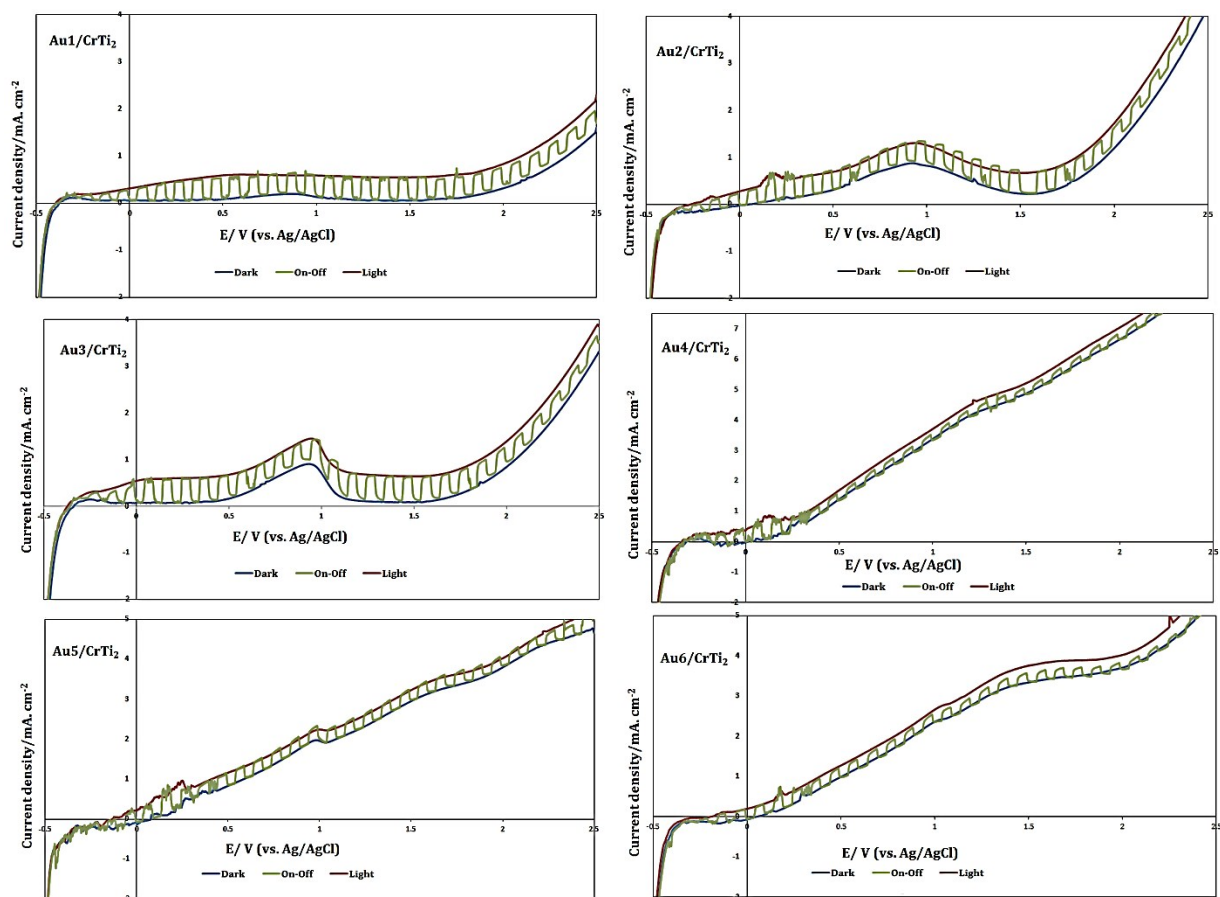

**Fig. S3.** LSV of Au/CrTiO<sub>2</sub> NTs samples recorded in KOH (1 M) aqueous solution containing 5% v/v ethylene glycol in the dark, under constant illumination and chopped light irradiation)

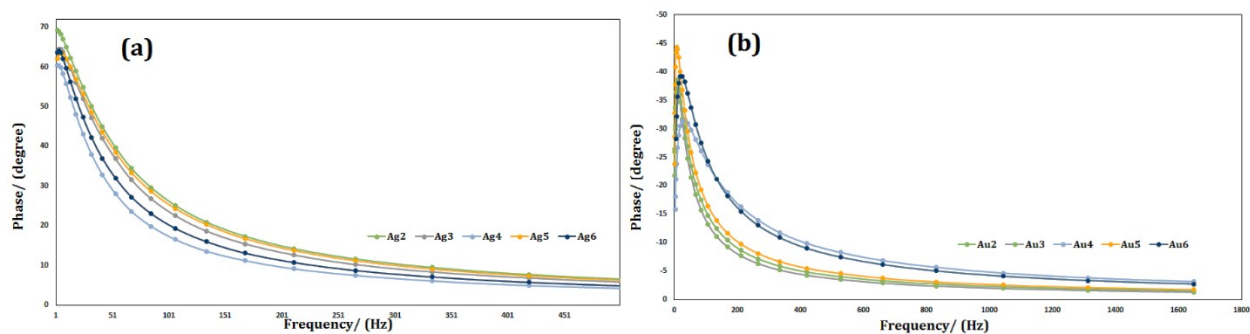

**Fig. S4.** The Phase diagram of Ag/CrTiO<sub>2</sub> NTs (a) and Au/CrTiO<sub>2</sub> NTs (b) at different times of photodeposition measured at 0.2 V vs. Ag/AgCl, in the presence of the illumination 200 mW cm<sup>-2</sup>
